# Supplementary material
Source: publisher figshare collection journal article supplement (https://karger.figshare.com/ndownloader/files/28411116)
Supplement: Supplementary file 1 [file 28411116]

## Sheet: Sheet1
Study	Number of teeth (surfaces if the number of teeth is not mentioned)	Type of dentition	Diagnostic technique	Reference standard	Tooth surface	Type of teeth
Abalos et al 2009	102	Permanent	DIAGNOdent, Visual examination	Operative intervention	Occlusal	First and second molars
Akbari et al 2013	44	Permanent	Bitewing radiography with radioopaque material between teeth	Visual examination after the use of elastic separators	Approximal	Premolars and permanent molars
Angnes et al 2005	57	Permanent	DIAGNOdent, Visual examination, Bitewing radiography	Histological examination	Occlusal	Third molars
Baelum et al 2012	338 surfaces	Permanent	Visual examination, Bitewing radiography	Visual examination after the use of elastic separators	Approximal	Not mentioned
Bahrololoomi et al 2015	109	Permanent	Visual examination, Bitewing radiography, DIAGNOdent Pen	Operative intervention	Occlusal	First molars
Barberia et al 2008	320	Mixed	DIAGNOdent	Visual examination	Occlusal	Primary molars and first permanent molars
Bizhang et al 2016	341 surfaces	Permanent	DIAGNOdent Pen, Visual examination	Bitewing radiography	Approximal	Molars and premolars
Błażejewska et al 2016	1222	Mixed	DIAGNOcam, Bitewing radiovisiography	Visual examination	Approximal	Molars and premolars
Bozdemir et al 2013	156	Permanent	LED-based device(The Midwest Caries I.D.), DIAGNOdent Pen, Visual examination	Operative intervention	Occlusal	Molars and premolars
Braga et al 2010	50	Primary/mixed	Visual examination	Histological examination	Occlusal	Primary molars
Bussaneli et al 2015	59 surfaces	Primary/mixed	Visual examination, Bitewing radiography, DIAGNOdent Pen	Visual examination after the use of elastic separators	Approximal	Primary molars
Castilho et al 2016	43	Permanent	DIAGNOdent, Visual examination	Histological examination	Occlusal	Third molars
Chan et al 2017	4056	Not mentioned	Extraoral bitewing radiography	Intraoral bitewing radiography	Approximal	Molars and premolars
Chu et al 2010	144	Permanent	DIAGNOdent, Visual examination, Bitewing radiography	Operative intervention	Occlusal	Random
Cinar et al 2013	44	Mixed	Visual examination, DIAGNOdent, DIAGNOdent Pen, Bitewing radiography	Histological examination	Occlusal	Primary molars
Costa et al 2008	199	Permanent	DIAGNOdent, Visual examination, Bitewing radiography	Operative intervention	Occlusal	Molars and premolars
Coutinho et al. 2014	355 surfaces	Primary/mixed	Visual examination, Bitewing radiography	Visual examination after the use of elastic separators	Proximal	Primary molars
De Souza et al 2018	184	Primary/mixed	DIAGNOdent Pen, Bitewing radiography	Visual examination	Approximal	Primary molars
Diniz et al 2012	105	Permanent	DIAGNOdent, DIAGNOdent Pen, Vista Proof, Visual examination, Bitewing radiography	Histological examination	Occlusal	Premolars and molars
Freitas et al 2016	89	Mixed	Visual examination (before and after tooth separation), Bitewing radiography	Histological examination	Approximal	Primary molars
Goel et al 2009	84	Primary	DIAGNOdent, Visual examination, Bitewing radiography, Tactile examination	Histological examination	Occlusal	Molars
Heinrich-Weltzien et al. 2002	281	Permanent	Visual examination, Bitewing radiography, DIAGNOdent	Operative intervention	Occlusal	Molars
Holtzman et al 2015	223	Permanent	OCT	Visual examination	Coronal surfaces	Not mentioned
Huth et al 2008	120	Permanent	DIAGNOdent Pen, Visual examination, Bitewing radiography	Operative intervention, Visual examination, Bitewing radiography	Occlusal	Molars
Huth et al 2010	117 surfaces	Permanent/mixed	DIAGNOdent Pen, Visual examination	Bitewing radiography	Approximal	Permanent molars
Jablonski Momeni et al 2014	306	Permanent	VistaProof	Bitewing radiography, Operative intervention, Visual examination	Occlusal	Molars and premolars
Jung et al 2017	791	Permanent	QLF	Visual examination	Occlusal	Not mentioned
Kavvadia et al 2008	130	Primary	DIAGNOdent, Visual examination, Indirect visual examination (photograph), Bitewing radiography,	Operative intervention	Occlusal	Molars
Kavvadia et al 2018	619	Permanent	DIAGNOdent Pen, Vista Proof, Visual examination, Indirect visual examination (photograph)	Visual examination after brackets removal	Buccal	Incisors, canines, premolars, molars
Kim et al 2017	280 surfaces	Permanent	QLF	Bitewing radiography	Approximal	Random
Kockanat et al 2017	120	Primary/mixed	Visual examination, DIAGNOdent pen, CarieScan PRO and SoproLife	Histological examination	Occlusal	Primary molars
Krause et al 2007	94	Permanent	DIAGNOdent, DIAGNOdent Pen, Visual Examination, Bitewing radiography	Operative intervention	Occlusal	Molars and premolars (not 3rd molars)
Kucukyilmaz et al 2015	200	Mixed	Visual examination, DIAGNOdent, ECM-IV, Bitewing radiography	Histological examination	Occlusal	Primary molars
Lussi et al 2001	332	Permanent	DIAGNOdent, Bitewing radiography, Visual examination	Operative intervention	Occlusal	Molars and premolars
Matalon et al 2007	197 surfaces	Permanent	Ultrasonic Caries Detector (UCD), Bitewing radiography	Operative intervention	Approximal	Not mentioned
Melo et al 2015	32	Permanent	Visual examination, Tactile examination, DIAGNOdent, VistaProof and CarieScan	Operative intervention	Occlusal	Molars and premolars
Mortensen et al 2018	57	Permanent	DIAGNOdent Pen, CarieScan Pro (ACIS)	Visual examination	Occlusal	Molars and premolars
Newman et al 2009	4112	Primary	Visual-tactile examination, Bitewing radiography	Correlation between methods	Occlusal and approximal	Random
Novaes et al 2009	621 surfaces	Primary	DIAGNOdent Pen, Visual examination, Bitewing radiography	Visual examination after the use of elastic separators	Approximal	Molars
Ozkan et al 2017	161 surfaces	Permanent	Near-infrared light transillumination, DIAGNOdent Pen, Visual examination, Bitewing radiography	Operative intervention	Approximal	Random
Rechmann et al 2012	433	Permanent	DIAGNOdent, Spectra Caries Detection Aid, Soprolife	Visual examination	Occlusal	Molars
Reis et al 2006	57	Permanent	DIAGNOdent, Visual examination	Histological examination	Occlusal	Third molars
Ribeiro et al 2015	43	Primary/mixed	Visual examination, DIAGNOdent Pen, Bitewing radiography	Computed microtomography	Approximal	Molars
Rocha et al 2003	30	Primary	DIAGNOdent, Visual examination, Bitewing radiography	Histological examination	Occlusal	First and second molars
Simon et al 2016	109	Permanent	NIR	Histological examination	Occlusal and approximal	Premolars
Singh et al 2016	25	Primary/mixed	Visual examination, Radiovisiography, CarieScan Pro	Histological examination	Occlusal	Primary molars
Subka et al 2019	356	Primary/mixed	Visual examination, Bitewing radiography, DIAGNOdent Pen	Histological examination	Approximal	Primary molars
Tassoker et al 2019	90 teeth	Permanent	DIAGNOdent Pen (LF pen), DIAGNOcam (NIR), Visual examination	Histological examination	Occlusal	Third molars
Teo et al 2013	64	Mixed	Visual examination, DIAGNOdent Pen, CarieScan Pro	Histological examination	Occlusal	Primary molars
Theocharopoulou et al 2014	37	Mixed	DIAGNOdent Pen, Soprolife	Visual examination	Occlusal	Molars
Zeitouny et al 2014	219	Permanent	SoproLife	Visual examination	Occlusal	Molars and premolars
Appendix table 1
